# Supplementary material for: Weaning from mechanical ventilation in people with neuromuscular disease: protocol for a systematic review
Source: PubMed Central journal article supplement — BMJ Open. 2019 Nov 4;9(11):e029890. doi: 10.1136/bmjopen-2019-029890 (PMC6858241; doi:10.1136/bmjopen-2019-029890), 2019-11-04
Supplement: bmjopen-2019-029890supp001.pdf [file bmjopen-2019-029890supp001.pdf]

**SEARCH STRATEGY – MEDLINE 1946 to Present with Weekly Update (Ovid)**

1. exp Neuromuscular Diseases/co, di, mo, nu, pa, ph, pp, pc, rh, th [Complications, Diagnosis, Mortality, Nursing, Pathology, Physiology, Physiopathology, Prevention & Control, Rehabilitation, Therapy]
2. Myotonic Dystrophy/ or Muscular Dystrophy, Duchenne/ or dystrophy.mp.
3. muscular dystrophy.mp. or exp Muscular Dystrophies/
4. Myasthenia Gravis/ or myasthenia.mp.
5. congenital myasthenia.mp. or exp Myasthenic Syndromes, Congenital/
6. myopathy.mp. or \*Muscular Diseases/
7. Myopathies, Structural, Congenital/ or congenital myopathy.mp.
8. inflammatory myopathy.mp. or \*Myositis/
9. metabolic myopathy.mp. or Mitochondrial Myopathies/
10. pompe disease.mp.
11. spinal muscular atrophy.mp. or exp Muscular Atrophy, Spinal/
12. Polyradiculoneuropathy/ or exp Guillain-Barre Syndrome/ or guillian barre.mp. or Polyneuropathies/
13. Peripheral Nervous System Diseases/ or severe inherited neuropathy.mp.
14. amyotrophic lateral sclerosis.mp. or exp Amyotrophic Lateral Sclerosis/
15. 1 or 2 or 3 or 4 or 5 or 6 or 7 or 8 or 9 or 10 or 11 or 12 or 13 or 14
16. Positive-Pressure Respiration/ or Respiration, Artificial/ or Ventilator Weaning/
17. Weaning/ or weaning.mp.
18. Airway Extubation/ or spontaneous breathing trial.mp.
19. 16 or 17 or 18
20. 15 and 19
